# Supplementary material for: Characterization of the promoter region of the bovine long-chain acyl-CoA synthetase 1 gene: Roles of E2F1, Sp1, KLF15, and E2F4
Source: PubMed Central journal article supplement (PMC4726046; doi:10.1038/srep19661), 2016-01-19
Supplement: srep19661-s1.pdf [file srep19661-s1.pdf]

**Characterization of the promoter region of the bovine acyl-CoA synthetase 1 gene: Roles of E2F1, Sp1, KLF15, and E2F4**

Zhi-Dong Zhao<sup>1</sup>, Lin-Sen Zan<sup>1,2,\*</sup>, An-Ning Li<sup>1</sup>, Gong Cheng<sup>1,2</sup>, Shi-Jun Li<sup>1</sup>, Ya-Ran Zhang<sup>1</sup>,  
Xiao-Yu Wang<sup>1</sup>, Ying-Ying Zhang<sup>1</sup>

1. College of Animal Science and Technology, Northwest A&F University, Yangling 712100

Shaanxi, People's Republic of China.

2. National Beef Cattle Improvement Center, Northwest A&F University, Yangling 712100

Shaanxi, People's Republic of China.

**Table S1.****Primers used in the expression and functional analysis of the ACSL1 promoter**

| Reaction                  | primer                   | Primer sequence(5'-3')                             | Binding region | Size (bp) |
|---------------------------|--------------------------|----------------------------------------------------|----------------|-----------|
| qRT-PCR                   | ACSL1 forward            | CTTCGCAGTGGCATCAATTAG                              | +53285/+53305  | 178       |
|                           | ACSL1 reverse            | GTCCGTAGCCTTCGTAGAAC                               | +55111/+55131  | --        |
|                           | β-actin forward          | CATCGGCAATGAGCGGTTCC                               | --             | 147       |
|                           | β-actin reverse          | ACCGTGTGGCGTAGAGGTC                                | --             | --        |
| Promoter cloning          | ACSL1 promoter forward   | TGGCAAACACTAGTACACCACAGACC                         | -1933/-1909    | 1954      |
|                           | ACSL1 promoter reverse   | CTGTCACTACAGCCCACTG                                | +3/+21         | --        |
|                           | ACSL1 promoter forward 1 | <b>GAGCTCT</b> GGCAAACACTAGTACACCACAGACC           | -1933/-1909    | 1954      |
|                           | ACSL1 promoter forward 2 | <b>GAGCTCTT</b> GCTGTACCACGTGCAGGAG                | -1634/-1613    | 1655      |
|                           | ACSL1 promoter forward 3 | <b>GAGCTCGGTC</b> CGGAACAGTCAGATATG                | -1328/-1307    | 1349      |
|                           | ACSL1 promoter forward 4 | <b>GAGCTCC</b> AGTAGAGGTTATCTGTAC                  | -1034/-1014    | 1055      |
|                           | ACSL1 promoter forward 5 | <b>GAGCTC</b> AGAAGTGGCAGGTGGAC                    | -730/-712      | 751       |
|                           | ACSL1 promoter forward 6 | <b>GAGCTCGCCT</b> GTGGATGAAGGTGGAAG                | -436/-415      | 457       |
|                           | ACSL1 promoter forward 7 | <b>GAGCTCTT</b> GTGAAATCCAGGCAGTCC                 | -325/-304      | 346       |
|                           | ACSL1 promoter forward 8 | <b>GAGCTCC</b> GAGCTCGCGGGGCGGAGCGGGGC             | -140/-120      | 161       |
|                           | ACSL1 promoter forward 9 | <b>GAGCTCC</b> GAGCTCTGCAGCGAGCGGCTGGAGCG          | -80/-120       | 101       |
|                           | ACSL1 promoter reverse 1 | <b>CTCGAGCT</b> GTCACTACAGCCCACTG                  | +3/+21         | --        |
| 5' RACE                   | R1                       | CGGGAACACCTCGTACGACTCGG                            | +20843/+35338  | 507       |
|                           | R2                       | GTAGTGACGGCCGTGGAGGTGAC                            | +39636/+39660  | 289       |
| Site-directed mutagenesis | E2F1 forward             | GCAGGGCCGCGGTGAGG <b>AAA</b> GGGCTGAGACGGGG        | -209/-176      | 346       |
|                           | E2F1 reverse             | CCCCGTCTCAGCC <b>TTT</b> CCTACGGCGCCCTGC           | --             | --        |
|                           | Sp1 forward              | GCGGGGTCCGAGCG <b>TTT</b> CGGGGCGGGCCCGG           | -175/-143      | 346       |
|                           | Sp1 reverse              | CCGGCCCCCGCCCG <b>AAA</b> CGCTCGGACCCCGC           | --             | --        |
|                           | KLF15 forward            | GGTCCGAGCGGGCC <b>AAA</b> GCGGGCCGGGGGGC           | -170/-138      | 346       |
|                           | KLF15 reverse            | GCCCCCGGCCCG <b>TTT</b> GCCCGCTCGGACC              | --             | --        |
|                           | E2F4 forward             | CCGAGCGGGCCGGG <b>TTT</b> GGCCGGGGCGGGG            | -167/-134      | 346       |
|                           | E2F4 reverse             | CCCCCCCCCGCC <b>AAA</b> CCCCCGCCCGCTCGG            | --             | --        |
|                           | KLF15-Sp1 forward        | GCGGGGTCCGAGCG <b>TTTCCAAA</b> GCGGGCCCGG          | -175/-143      | 346       |
|                           | KLF15-Sp1 reverse        | CCGGCCCCCG <b>TTTGGAAA</b> CGCTCGGACCCCGC          | --             | --        |
|                           | E2F4-Sp1 forward         | GCGGGGTCCGAGCG <b>TTTCCGGTT</b> GGCCCGG            | -175/-143      | 346       |
|                           | E2F4-Sp1 reverse         | CCGGCC <b>AAA</b> CCCCCG <b>AAA</b> CGCTCGGACCCCGC | --             | --        |
|                           | KLF15- E2F4 forward      | CCGAGCGGGCC <b>AAA</b> G <b>TTT</b> GGCCGGGGCGGGG  | -167/-134      | 346       |
|                           | KLF15- E2F4 reverse      | CCCCCCCCCGCC <b>AAACTTT</b> GGCCCCGCTCGG           | --             | --        |
| EMSA                      | E2F1 forward             | GCAGGGCCGCGGTGAG <b>GGGGG</b> GCTGAGACGGGG         | -209/-176      | 346       |
|                           | E2F1 reverse             | CCCCGTCTCAGC <b>CCGCC</b> CCTACGGCGCCCTGC          | --             | --        |
|                           | Sp1 forward              | GCGGGGTCCGAGCG <b>GGGCC</b> GGGGCGGGCCCGG          | -175/-143      | 346       |
|                           | Sp1 reverse              | CCGGCCCCCGCC <b>GGCCC</b> CGCTCGGACCCCGC           | --             | --        |
|                           | KLF15 forward            | GGTCCGAGCGGGCC <b>GGGGC</b> GGGGCCGGGGGGC          | -170/-138      | 346       |
|                           | KLF15 reverse            | GCCCCCGGCC <b>CGCCC</b> GGCCCCGCTCGGACC            | --             | --        |
|                           | E2F4 forward             | CCGAGCGGGCCGGG <b>GCGG</b> GGCCGGGGCGGGG           | -167/-134      | 346       |
|                           | E2F4 reverse             | CCCCCCCCCGCC <b>CCGC</b> CCCGCCCGCTCGG             | --             | --        |
